# Supplementary material
Source: PubMed Central journal article supplement (PMC3400808)
Supplement: supp_111.191072_JPET_191072_suppl_figures.pdf [file supp_111.191072_JPET_191072_suppl_figures.pdf]

**SUPPLEMENTAL DATA**

**Penitrem A as a tool to understand the role of BK channels in vascular function**

Shinichi Asano, Ian N. Bratz, Zachary C. Berwick, Ibra S. Fancher, Johnathan D. Tune, and  
Gregory M. Dick

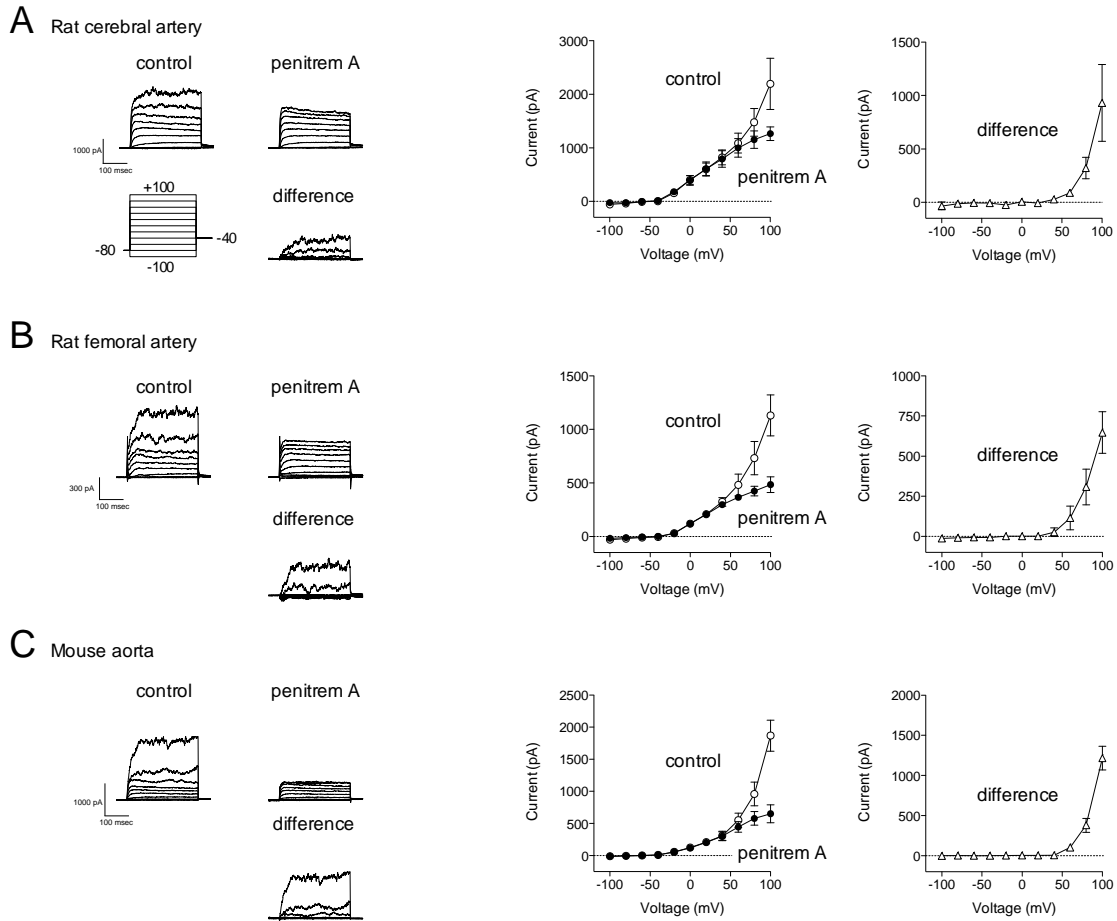

## Supplemental Fig. 1

**Supplemental Fig. 1 Penitrem A inhibits BK, but not  $K_v$ , channels in a variety of smooth muscle cell types.** We demonstrate that penitrem A (1  $\mu$ M) inhibits the same type of strongly outwardly rectifying current without effect on native delayed rectifier  $K^+$  channels. Currents were measured in smooth muscle cells isolated from rat middle cerebral artery (Panel A;  $n = 3$ ), rat femoral artery (Panel B;  $n = 3$ ), mouse aorta (Panel C;  $n = 3$ ), pig coronary artery (Panel D;  $n = 5$ ), and dog coronary artery (Panel E;  $n = 7$ ). The voltage template (shown in A) was the same for all experiments. Solutions for whole-cell currents are described in the Methods. Panel F contains data showing that penitrem A 1  $\mu$ M inhibits the  $\alpha$  subunit cloned from cow (courtesy of Dr. Michael Davis, University of Missouri) and expressed in HEK 293 cells ( $n = 3$ ).

**D** Porcine coronary artery

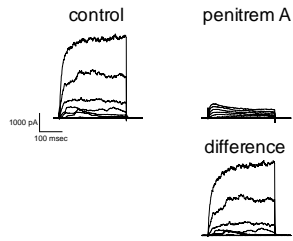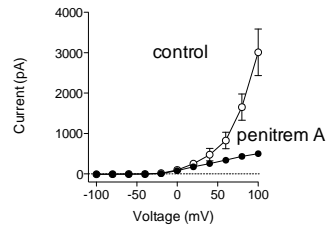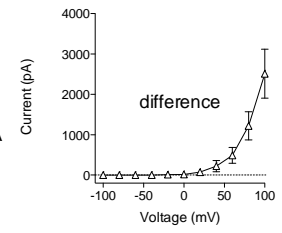

**E** Canine coronary artery

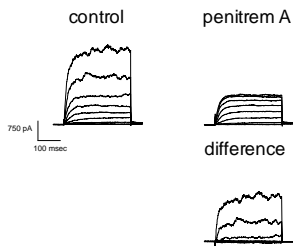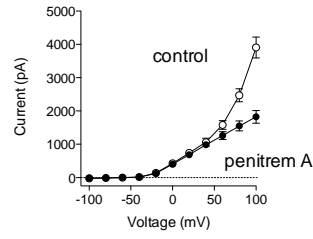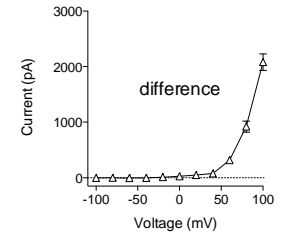

**F** Bovine KCNMA1

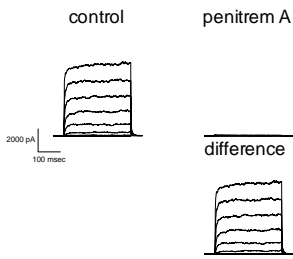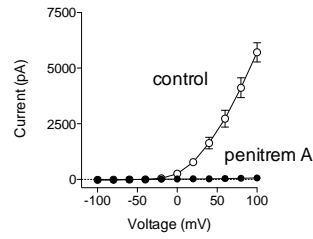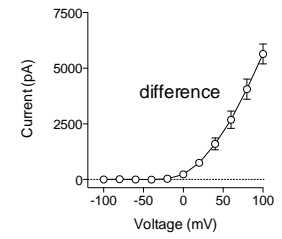

**Supplemental Fig. 1 (cont)**

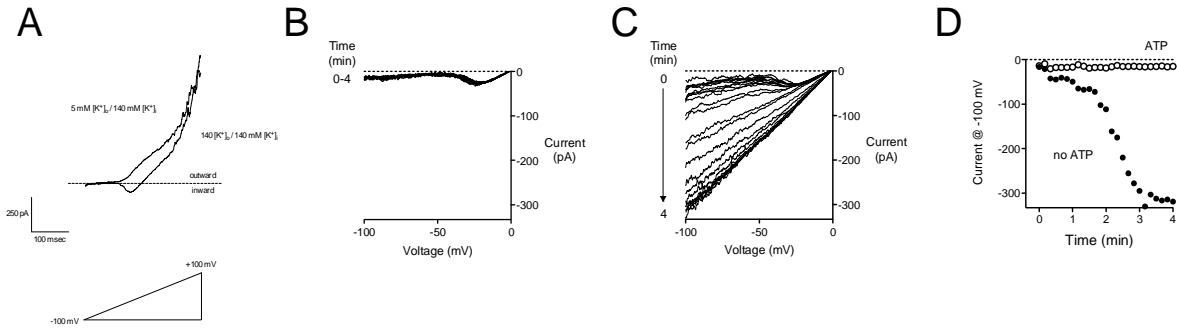

### Supplemental Fig. 2 Dialysis of smooth muscle cells with ATP-free pipette solution

**activates  $K_{ATP}$  current.** Cells were dialyzed with an ATP-free pipette solution to activate  $K_{ATP}$  channels in symmetrical 140 mM  $K^+$ . Panel A shows current in a mouse aortic myocyte in physiological and symmetrical  $K^+$  solutions. The delayed rectifier  $K^+$  current becomes inward in 140 mM  $K^+$ . Panels B and C show the effect of intracellular ATP on the development of linear inward current in cells bathed in 140 mM  $K^+$ . The cell in panel B was dialyzed with a solution containing 5 mM Mg-ATP, whereas the solution dialyzing the cell in panel C contained no Mg-ATP. Note that significant inward current developed only in the cell dialyzed with an ATP-free pipette solution. Panel D contains a plot of current at -100 mV vs. time for the cells in panels B and C. Inward current in cells dialyzed with ATP-free pipette solution was abolished by glibenclamide (10  $\mu$ M; see Fig. 5C & D of the manuscript). In contrast,  $K_{ATP}$  current was unaffected by penitrem A (1  $\mu$ M; see Fig. 5C & D of the manuscript).
